# Supplementary material for: Template syntheses of diverse haloargentates with reversible photochromism behaviors and efficient photocatalytic properties
Source: Royal Society of Chemistry journal article supplement (doi:10.1039/d0ce01642j), 2021-01-01
Supplement: d0ce01642j1.pdf [file d0ce01642j1.pdf]

## **Template syntheses of diverse haloargentates with reversible photochromism behaviors and efficient photocatalytic properties**

Zhen-Zhen Xue,<sup>ab</sup> A-Ni Wang,<sup>a</sup> Qi Wei,<sup>a</sup> Li Wei,<sup>a</sup> Song-De Han,<sup>a</sup> Jie Pan<sup>\*,a</sup>

<sup>a</sup>College of Chemistry and Chemical Engineering, Qingdao University, Shandong 266071, China

<sup>b</sup>State Key Laboratory of Photocatalysis on Energy and Environment, Fuzhou University, Fuzhou, 350116, China

E-mail: [tsingtaopj@163.com](mailto:tsingtaopj@163.com)

**Table S1** Selected bond lengths (Å) and angles (°) for **1-3**.

| Compound 1           |             |                      |             |
|----------------------|-------------|----------------------|-------------|
| Ag(1)-I(2)#1         | 2.8509(7)   | Ag(1)-I(2)           | 2.8509(7)   |
| Ag(1)-I(1)#2         | 2.8741(7)   | Ag(1)-I(1)           | 2.8741(7)   |
| Ag(1)-Ag(1)#1        | 3.2796(17)  | I(1)-Ag(1)#2         | 2.8741(8)   |
| I(2)-Ag(1)#1         | 2.8509(7)   | I(2)#1-Ag(1)-I(2)    | 109.77(3)   |
| I(2)#1-Ag(1)-I(1)#2  | 115.193(19) | I(2)-Ag(1)-I(1)#2    | 108.359(18) |
| I(2)#1-Ag(1)-I(1)    | 108.359(18) | I(2)-Ag(1)-I(1)      | 115.193(19) |
| I(1)#2-Ag(1)-I(1)    | 99.85(3)    | I(2)#1-Ag(1)-Ag(1)#1 | 54.887(16)  |
| I(2)-Ag(1)-Ag(1)#1   | 54.887(16)  | I(1)#2-Ag(1)-Ag(1)#1 | 130.077(15) |
| I(1)-Ag(1)-Ag(1)#1   | 130.077(15) | Ag(1)#2-I(1)-Ag(1)   | 80.15(3)    |
| Ag(1)#1-I(2)-Ag(1)   | 70.23(3)    |                      |             |
| Compound 2           |             |                      |             |
| Ag(1)-I(3)           | 2.7429(10)  | Ag(1)-I(2)           | 2.7630(10)  |
| Ag(1)-Ag(1)#1        | 2.9553(15)  | Ag(1)-I(1)#1         | 2.9741(11)  |
| Ag(1)-I(1)           | 2.9927(11)  | I(1)-Ag(1)#1         | 2.9741(11)  |
| I(1)-Ag(1)#3         | 2.9741(11)  | I(1)-Ag(1)#4         | 2.9927(11)  |
| I(2)-Ag(1)#2         | 2.7630(10)  | I(3)-Ag(1)#4         | 2.7429(10)  |
| I(3)-Ag(1)-I(2)      | 123.68(3)   | I(3)-Ag(1)-Ag(1)#1   | 112.35(4)   |
| I(2)-Ag(1)-Ag(1)#1   | 123.89(4)   | I(3)-Ag(1)-I(1)#1    | 103.01(3)   |
| I(2)-Ag(1)-I(1)#1    | 106.16(3)   | Ag(1)#1-Ag(1)-I(1)#1 | 60.62(3)    |
| I(3)-Ag(1)-I(1)      | 98.73(3)    | I(2)-Ag(1)-I(1)      | 105.90(3)   |
| Ag(1)#1-Ag(1)-I(1)   | 60.00(3)    | I(1)#1-Ag(1)-I(1)    | 120.62(3)   |
| Ag(1)#1-I(1)-Ag(1)#3 | 70.62(4)    | Ag(1)#1-I(1)-Ag(1)   | 59.38(3)    |
| Ag(1)#3-I(1)-Ag(1)   | 102.12(3)   | Ag(1)#1-I(1)-Ag(1)#4 | 102.12(3)   |
| Ag(1)#3-I(1)-Ag(1)#4 | 59.38(3)    | Ag(1)-I(1)-Ag(1)#4   | 76.96(4)    |
| Ag(1)#2-I(2)-Ag(1)   | 76.95(4)    | Ag(1)#4-I(3)-Ag(1)   | 85.51(4)    |
| Compound 3           |             |                      |             |
| Ag(1)-Br(2)          | 2.6124(13)  | Ag(1)-Br(1)          | 2.6145(15)  |
| Ag(1)-Br(3)          | 2.8381(16)  | Ag(1)-Br(3)#1        | 2.8494(16)  |
| Ag(1)-Ag(1)#1        | 2.9634(19)  | Ag(1)-Ag(1)#2        | 3.306(2)    |
| Br(1)-Ag(1)#3        | 2.6145(15)  | Br(2)-Ag(1)#2        | 2.6124(13)  |
| Br(3)-Ag(1)#3        | 2.8381(16)  | Br(3)-Ag(1)#4        | 2.8494(16)  |
| Br(3)-Ag(1)#1        | 2.8494(16)  | Br(2)-Ag(1)-Br(1)    | 123.15(6)   |

|                       |           |                       |           |
|-----------------------|-----------|-----------------------|-----------|
| Br(2)-Ag(1)-Br(3)     | 111.85(5) | Br(1)-Ag(1)-Br(3)     | 97.91(4)  |
| Br(2)-Ag(1)-Br(3)#1   | 105.07(4) | Br(1)-Ag(1)-Br(3)#1   | 102.10(5) |
| Br(3)-Ag(1)-Br(3)#1   | 117.20(4) | Br(2)-Ag(1)-Ag(1)#1   | 127.33(6) |
| Br(1)-Ag(1)-Ag(1)#1   | 109.47(6) | Br(3)-Ag(1)-Ag(1)#1   | 58.78(4)  |
| Br(3)#1-Ag(1)-Ag(1)#1 | 58.41(4)  | Br(2)-Ag(1)-Ag(1)#2   | 50.75(3)  |
| Br(1)-Ag(1)-Ag(1)#2   | 132.84(3) | Br(3)-Ag(1)-Ag(1)#2   | 128.79(3) |
| Br(3)#1-Ag(1)-Ag(1)#2 | 54.54(2)  | Ag(1)#1-Ag(1)-Ag(1)#2 | 92.41(4)  |
| Ag(1)-Br(1)-Ag(1)#3   | 85.69(6)  | Ag(1)-Br(2)-Ag(1)#2   | 78.51(6)  |
| Ag(1)#3-Br(3)-Ag(1)   | 77.57(5)  | Ag(1)#3-Br(3)-Ag(1)#4 | 62.80(4)  |
| Ag(1)-Br(3)-Ag(1)#4   | 105.65(5) | Ag(1)#3-Br(3)-Ag(1)#1 | 105.65(5) |
| Ag(1)-Br(3)-Ag(1)#1   | 62.80(4)  | Ag(1)#4-Br(3)-Ag(1)#1 | 70.92(5)  |

Symmetry codes for **1**: (#1)  $-x+2, -y, -z+1$ ; (#2)  $-x+2, -y+1, -z+1$ . **2**: (#1)  $-x+1, -y+2, -z+1$ ; (#2)  $x, -y+5/2, z$ ; (#3)  $-x+1, y-1/2, -z+1$ ; (#4)  $x, -y+3/2, z$ . **3**: (#1)  $-x, -y, -z+1$ ; (#2)  $x, -y-1/2, z$ ; (#3)  $x, -y+1/2, z$ ; (#4)  $-x, y+1/2, -z+1$ .

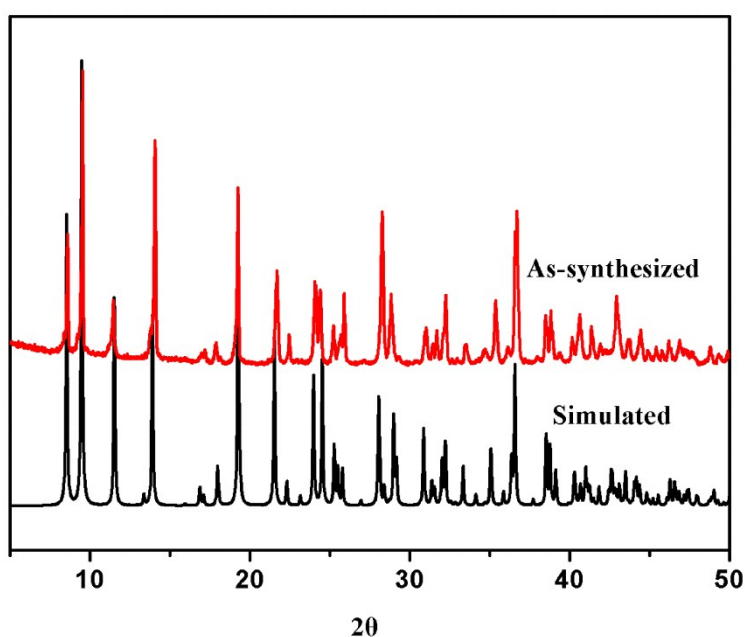

**Figure S1** PXRD patterns of simulated from the single-crystal data of compound **1** (black); as-synthesized (red).

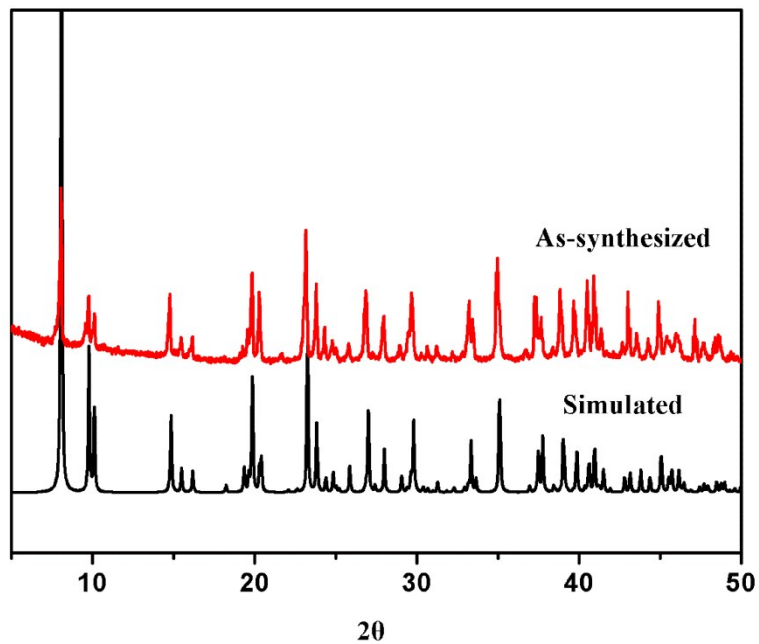

**Figure S2** PXRD patterns of simulated from the single-crystal data of compound **2** (black); as-synthesized (red).

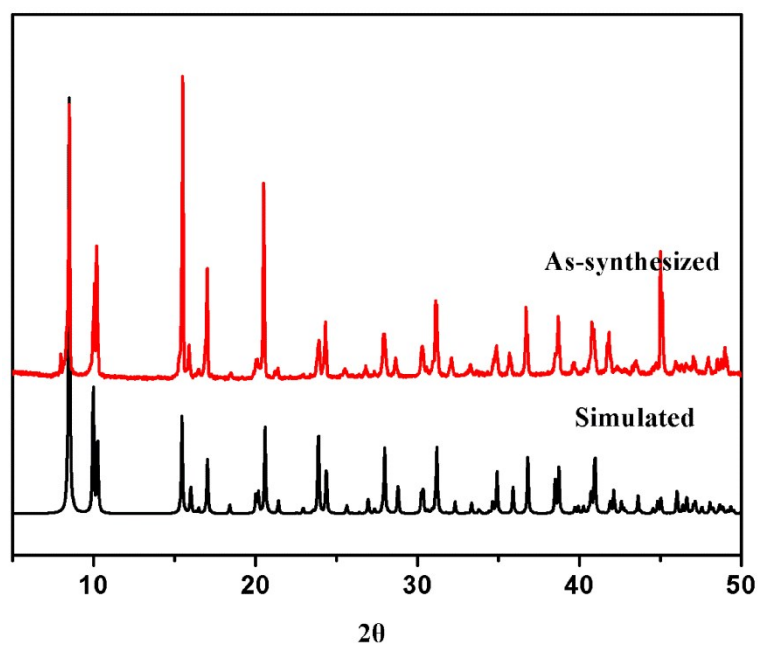

**Figure S3** PXRD patterns of simulated from the single-crystal data of compound **3** (black); as-synthesized (red).

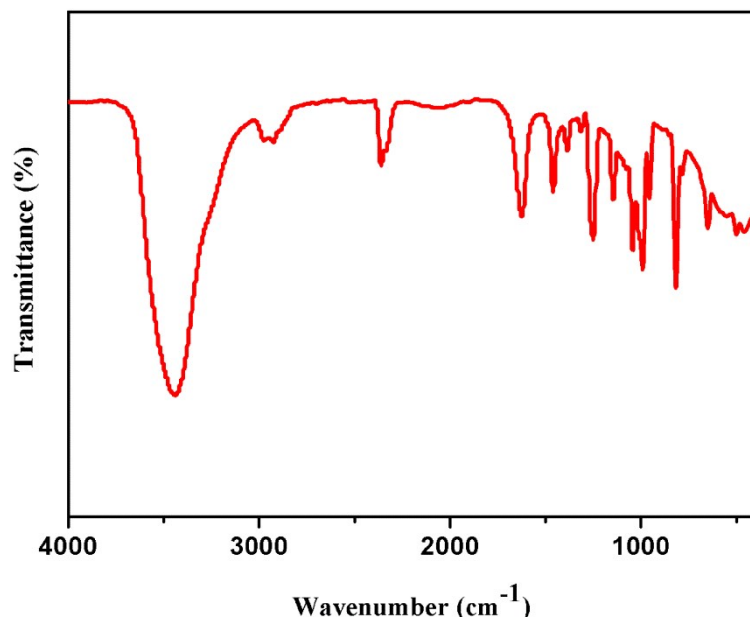

**Figure S4** IR spectrum of compound **1**.

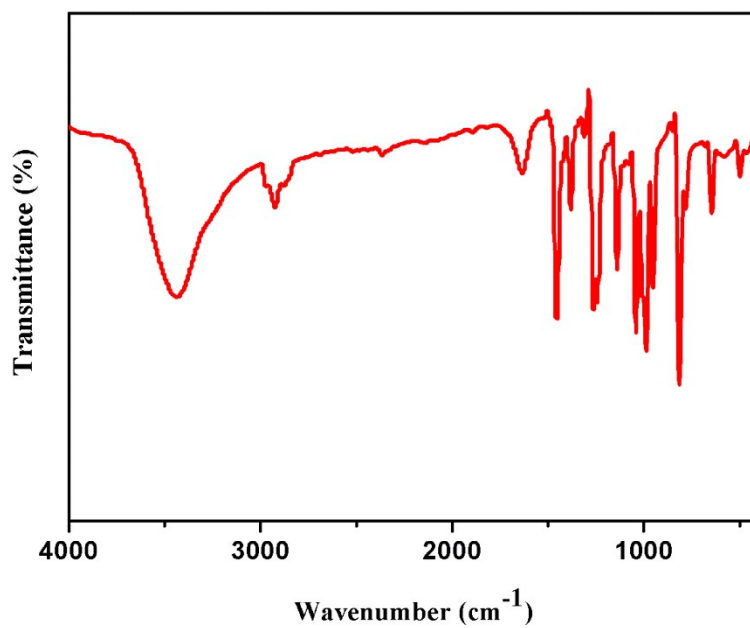

**Figure S5** IR spectrum of compound **2**.

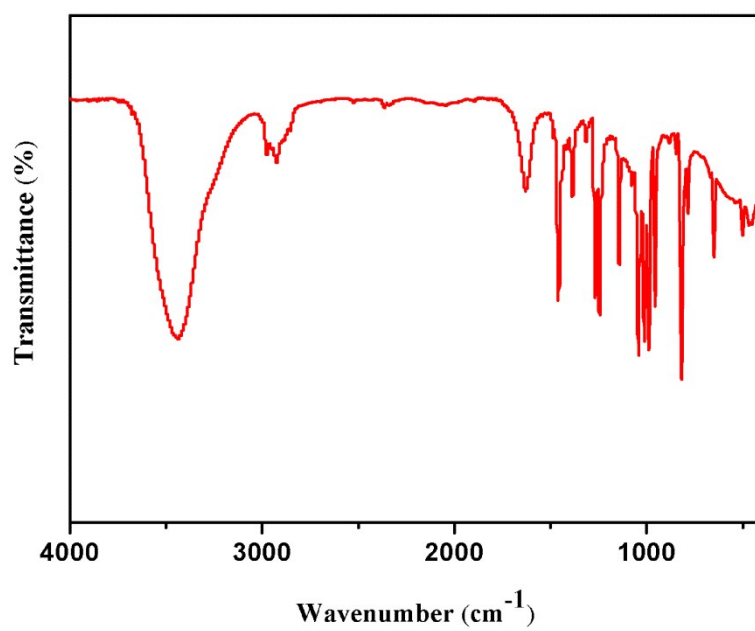

**Figure S6** IR spectrum of compound **3**.

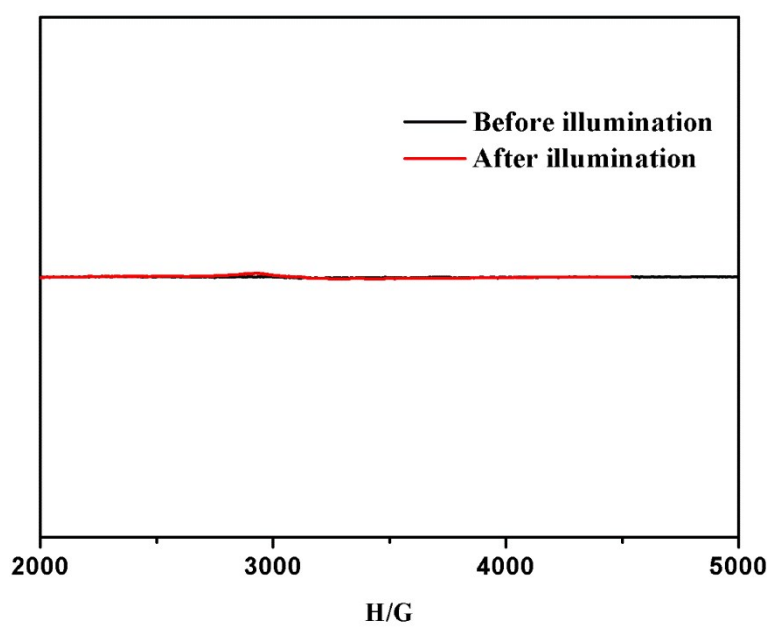

**Figure S7** ESR spectra before and after light illumination for compound **1**.

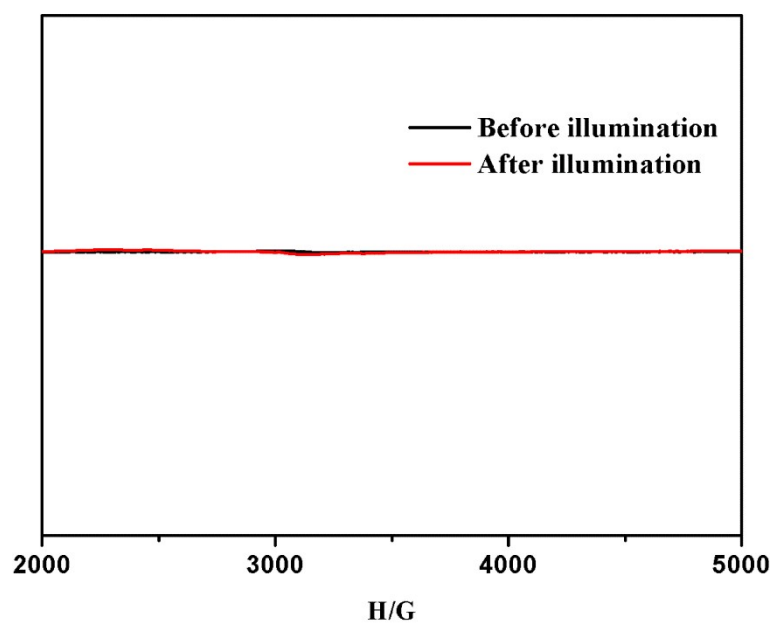

**Figure S8** ESR spectra before and after light illumination for compound **2**.

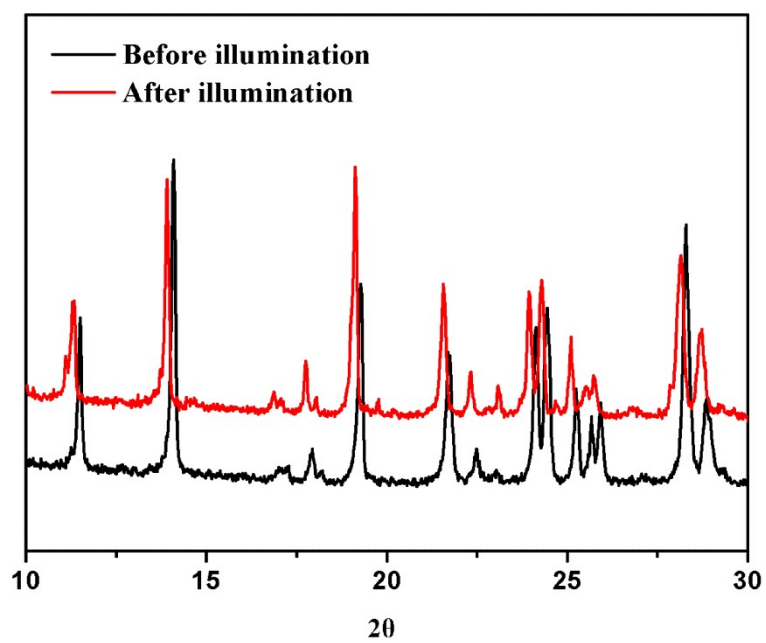

**Figure S9** PXRD patterns of compound **1** before (black) and after (red) light illumination.

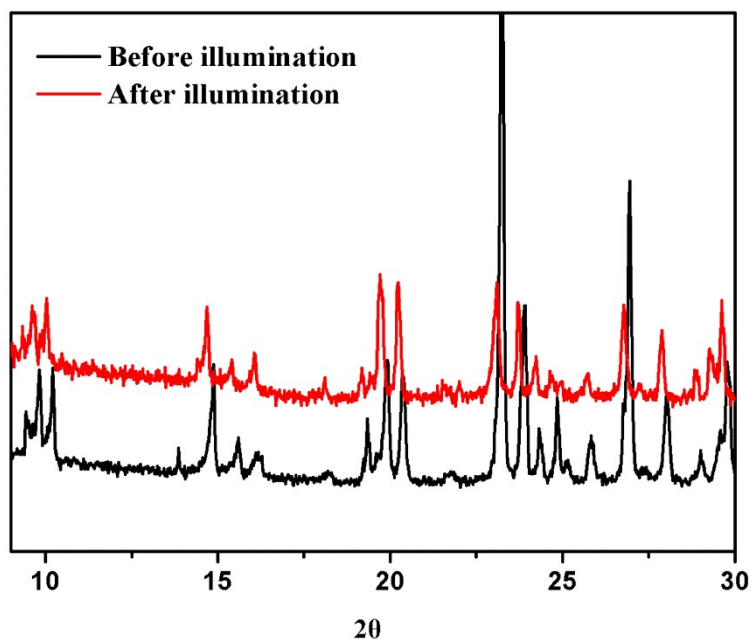

**Figure S10** PXRd patterns of compound 2 before (black) and after (red) light illumination.

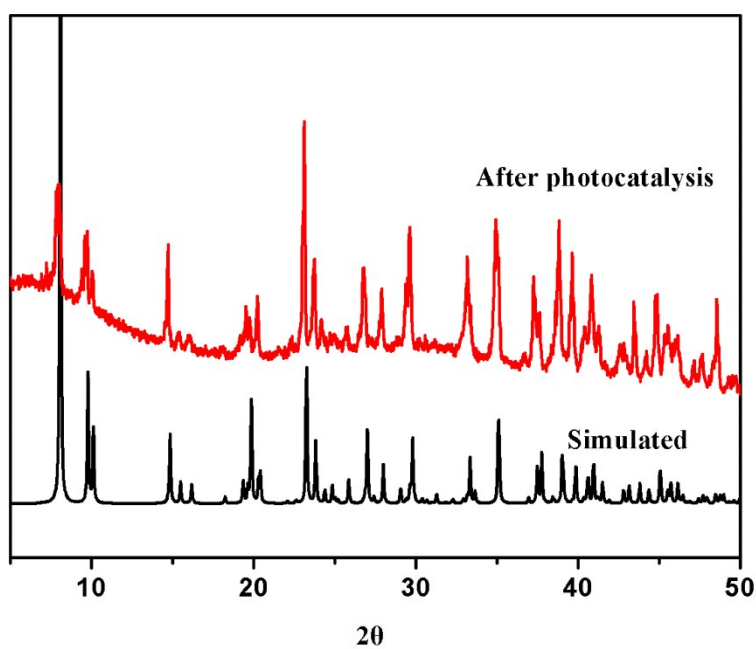

**Figure S11** PXRd pattern of compound 2 after photocatalysis experiment.



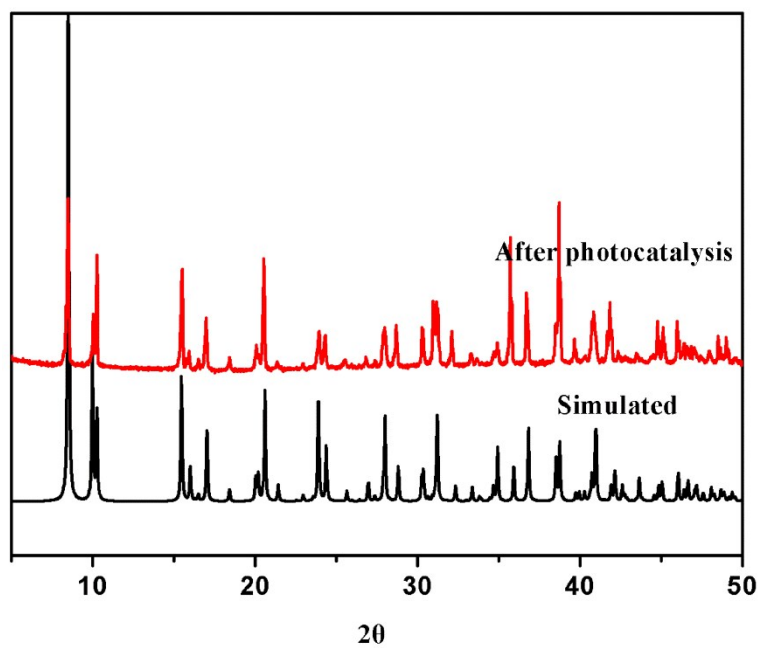

**Figure S12** PXR D pattern of compound 3 after photocatalysis experiment.

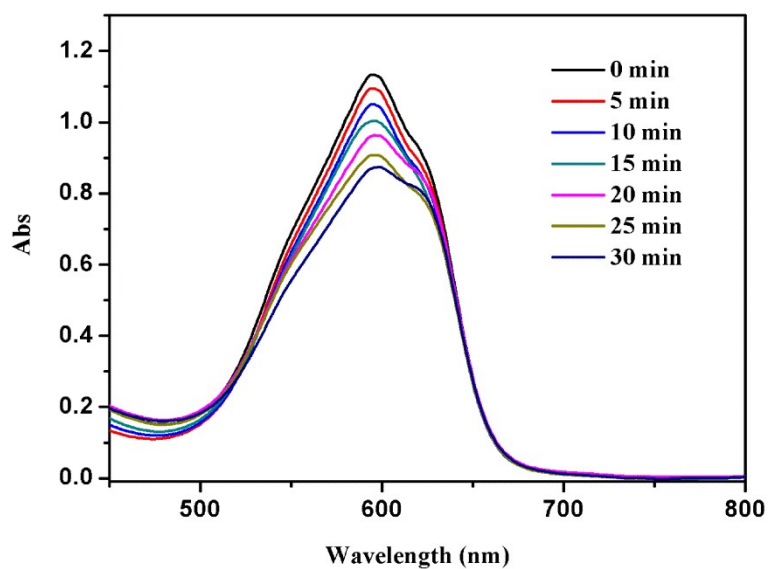

**Figure S13** UV-vis spectra for MB in the presence of compound 2 and BQ under UV light.

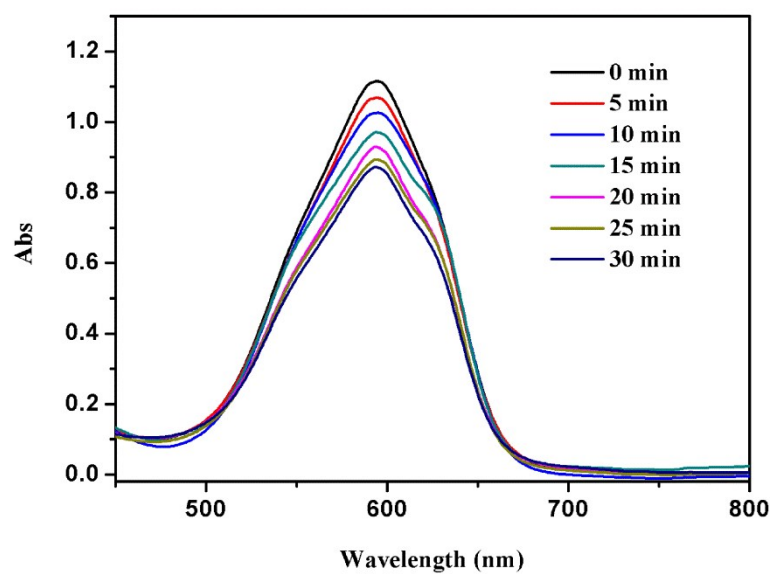

**Figure S14** UV-vis spectra for MB in the presence of compound 3 and BQ under UV light.
